# Supplementary material for: The effects of Steel Plate Shear Wall on Residual Capacity of Reinforced Concrete Frame under Sequence Earthquakes by Incremental Dynamic Analysis
Source: Research Square preprint supplement (doi:10.21203/rs.3.rs-866641/v1), 2021-09-08
Supplement: Supplementary file 1 [file 23546c98482f47c746134f1d.docx]

**Table 5.** The result for scaling the second category of seismic scenario (with nearly maximum EPA).

| **Scale coefficient**  **of Models** | | | | **EPA**  **Mainshock,**  **Aftershock** | **Ratio PGA Aftershock to Mainshock** | **PGA(g)**  **Aftershock Earthquake** | **PGA(g)**  **Mainshock Earthquake** | **Aias**  **Intensity** | **Year month day**  **Time** | **Station name** | **Earthquake name** |
| --- | --- | --- | --- | --- | --- | --- | --- | --- | --- | --- | --- |
| **24st** | **12st** | **8st** | **4st** | **cm/s** |
| 2.70 | 1.83 | 1.65 | 1.37 | 0.2197,0.0887 | 0.43 | 0.106 | 0.248 | 50.1  6.9 | 86-07-21  14:42,14:51 | CDMG 54171 Bishop-LADWP South St | Chalfant Valley |
| 4.17 | 2.15 | 1.78 | 1.31 | 0.1797-0.2268 | 1.23 | 0.262 | 0.212 | 31.7  63.9 | 99-09-20  17:57,18:03 | CWB 99999 TCU079 | Chi-Chi Taiwan 1 |
| 3.73 | 1.72 | 1.42 | 1.00 | 0.1026-0.2844 | 0.38 | 0.15 | 0.396 | 14.8  78.7 | 99-09-20  17:57,18:03 | CWB 99999 TCU129 | Chi-Chi Taiwan 2 |
| 1.28 | 1.05 | 0.92 | 0.71 | 0.4215-0.1614 | 0.46 | 0.238 | 0.519 | 165.4  11.1 | 79-10-15  23:16, 23:19 | USGS 952 EL Centro Array #5 | Imperial Valley |
| 1.37 | 1.46 | 1.35 | 1.29 | 0.2528-0.0771 | 0.28 | 0.071 | 0.25 | 144.1  7.3 | 80-11-23  19:34,19:35 | ENEL 99999 Sturno | Irpinia, Italy 1 |
| 1.82 | 1.69 | 2.28 | 2.43 | 0.1335-0.1221 | 0.74 | 0.132 | 0.177 | 57.8  46.3 | 80-11-23  19:34,19:35 | ENEL 99999 Calitri | Irpinia, Italy 2 |
| 0.78 | 0.62 | 0.58 | 0.49 | 0.6244-0.0385-0.0944 | 0.18 | 0.107 | 0.583 | 436  1.3  7.3 | 94-01-17  12:31,12:32,12:41 | CDMG 24279 Newhall - Fire Sta | Northridge 1 |
| 0.47 | 0.34 | 0.28 | 0.22 | 1.3491-.0638 | 0.04 | 0.069 | 1.78 | 2274.8  4.5 | 94-01-17  12:31,12:41 | CDMG 24436 Tarzana – Cedar Hill A | Northridge 2 |
